# Supplementary material for: Effect of steam on heat storage and attrition performance of limestone under fluidization during CaO/CaCO3 heat storage cycles
Source: Royal Society of Chemistry journal article supplement (doi:10.1039/d2re00164k), 2022-01-01
Supplement: d2re00164k1.pdf [file d2re00164k1.pdf]

1 **Supporting information for**

2 **Effect of steam on heat storage and attrition performance of limestone**  
3 **under fluidization during CaO/CaCO<sub>3</sub> heat storage cycles**

4 Yi Fang<sup>a</sup>, Yingjie Li<sup>a,\*</sup>, Yehui Dou<sup>a</sup>, Zirui He<sup>b</sup>, Jianli Zhao<sup>a</sup>

5 <sup>a</sup> Shandong Engineering Laboratory for High-efficiency Energy Conservation and Energy Storage  
6 Technology & Equipment, School of Energy and Power Engineering, Shandong University, Jinan 250061, China

7 <sup>b</sup> Institute of Mechanics, Materials and Civil Engineering (iMMC), Materials & Process Engineering  
8 (IMAP), Université Catholique de Louvain, Place Sainte Barbe 2, B-1348 Louvain-la-Neuve, Belgium

9  
10  
11  
12  
13  
14  
15  
16  

---

\* Corresponding author: E-mail: liyj@sdu.edu.cn (Y. Li).

17 The numerical model

18 In this work, the CFD-DEM model was used to simulate hydrodynamics, heat transfer, and the heterogeneous  
19 reaction of CaO/CaCO<sub>3</sub> heat storage. The mass and momentum conservation equations are shown as follows:

$$20 \quad \frac{\partial \rho}{\partial t} + \nabla \cdot (\rho \mathbf{v}) = s_1 \quad (S1)$$

$$21 \quad s_1 = MWw \quad (S2)$$

$$22 \quad \frac{\partial}{\partial t} (\rho \cdot \mathbf{v}) + \nabla \cdot (\rho \cdot \mathbf{v} \cdot \mathbf{v}) = -\nabla p + \nabla \cdot \bar{\bar{\tau}} + \rho \mathbf{g} + \mathbf{F} \quad (S3)$$

23 where  $\rho$  is density, kg·m<sup>-3</sup>;  $\mathbf{v}$  is velocity, m·s<sup>-1</sup>;  $p$  is static pressure, Pa;  $\tau$  is stress tensor, N·m<sup>-2</sup>;  $s_1$  is the mass source  
24 term for the specie, kg·m<sup>-3</sup>s<sup>-1</sup>;  $MW$  is molecular weight, kg mol<sup>-1</sup>;  $w$  is molar production rate, mol·m<sup>-3</sup>s<sup>-1</sup>;  $\mathbf{F}$   
25 **Error!Error!** is the force applied by particles, N.

26 The force equation of a single particle is as follows:

$$27 \quad m_p \frac{d\mathbf{u}_p}{dt} = \mathbf{F}_{\text{drag}} + \mathbf{F}_{\text{pressure}} + \mathbf{F}_{\text{gravity}} + \sum_1^N (\mathbf{F}_N + \mathbf{F}_T) \quad (S4)$$

28 where  $m_p$  is particle mass, kg;  $\mathbf{u}_p$  is particle velocity, m·s<sup>-1</sup>;  $\mathbf{F}_{\text{drag}}$  is the drag force given by Gidaspow, N;  $\mathbf{F}_{\text{pressure}}$   
29 is the force of pressure, N;  $\mathbf{F}_{\text{gravity}}$  is the force of gravity, N;  $\mathbf{F}_N$  and  $\mathbf{F}_T$  represent normal and tangential components  
30 of the contact force.

31 To simplify the calculation, radiation heat transfer was ignored, energy conservation equations for particles  
32 and continuous phases are shown as follows:

$$33 \quad m_p c_p \frac{dT_p}{dt} = hA_p (T_\infty - T_p) - \frac{dm_p}{dt} \Delta H \quad (S5)$$

$$34 \quad \frac{\partial}{\partial t} (\rho E) + \nabla \cdot (\mathbf{v}(\rho E + p)) = \nabla \cdot \lambda \nabla T + S_h + S_q \quad (S6)$$

35 where  $c_p$  is the specific heat capacity of the particles, J·g·K<sup>-1</sup>;  $T_p$  is the temperature of the particles, K;  $h$  is the heat  
36 transfer coefficient, W·m<sup>-2</sup>·K<sup>-1</sup>;  $E$  is the internal energy, J;  $\lambda$  is the effective conductivity, W·m<sup>-1</sup>·K<sup>-1</sup>;  $S_q$  is the heat  
37 source due to gas-particle convective heat transfer, J·mol<sup>-1</sup>;  $S_h$  is the heat from the interphase transferred mass, J.

38 In this reaction, the heat of the reaction  $\Delta H$  is released from the particles.

39 Species transport equation of gas species  $i$  is shown as follows:

$$40 \quad \frac{\partial}{\partial t}(\rho Y_i) + \nabla \cdot (\rho \mathbf{v} Y_i) = -\nabla \cdot \mathbf{j}_i + R_i \quad (S7)$$

41 where  $Y_i$  is the mass fraction of the gas;  $\mathbf{j}_i$  is diffusion coefficient of gas,  $\text{kg} \cdot \text{m}^{-2} \cdot \text{s}^{-1}$ ;  $R_i$  is production rate of species  
42 due to the heterogeneous reaction  $\text{m}^{-3}$ .

43 The heterogeneous reaction of  $\text{CO}_2$  and  $\text{CaO}$  is a complex process. To simplify the model, it is assumed that  
44 the particle size is constant during the reaction. The apparent reaction rate was determined by Sun <sup>1</sup>:

$$45 \quad R = \frac{dX}{dt(1-X)} 56k(P_{\text{CO}_2} - P_{\text{eq}})^n S \quad (S8)$$

46 Where  $R$  is apparent reaction rate,  $\text{s}^{-1}$ ;  $X$  is the conversion of  $\text{CaO}$ ;  $P_{\text{CO}_2}$  is the partial pressure of  $\text{CO}_2$ ,  $\text{KPa}$ ;  $P_{\text{eq}}$  is  
47 the equilibrium partial pressure of  $\text{CO}_2$ ,  $\text{KPa}$ .  $S$  is the specific surface area of the  $\text{CaO}$ ,  $\text{m}^2/\text{g}$ . The value of  $k$  and  $n$   
48 is determined by the difference between the  $\text{CO}_2$  partial pressure and the equilibrium partial pressure:

$$49 \quad k = 1.67 \times 10^{-3} \exp\left(\frac{-29}{0.008314T_p}\right), n = 0, (P_{\text{CO}_2} - P_{\text{eq}}) > 10; \quad (S9)$$

$$50 \quad k = 1.67 \times 10^{-4} \exp\left(\frac{-29}{0.008314T_p}\right), n = 1, (P_{\text{CO}_2} - P_{\text{eq}}) < 10; \quad (S10)$$

51 Reactor geometry

52 The reactor was simplified as a  $12.6 \times 40$  pseudo-3D fluidized bed as shown in Fig. S1. The diameter of the  
53 furnace was 3.2 cm, the width of the insulation layer was 4.5 cm, and the limestone particles with a height of 2 cm  
54 were placed at the bottom of the furnace. The gas entered from the bottom and the outlet was the pressure-outlet.  
55 Before the reaction, the wall surface of the reaction zone was set as a constant temperature at  $600 \text{ }^\circ\text{C}$  and particles  
56 were fluidized for 10 s. After the simulation was stable, the chemical reaction module was turned on and the wall  
57 surface of the reaction zone was changed to fluid-solid temperature coupling. Table 1 lists the parameters of the  
58 simulated system.

59 Table S1 Computational parameter.

|                                  |          |                                        |                    |
|----------------------------------|----------|----------------------------------------|--------------------|
| Bed size, cm × cm                | 12.6×40  | Fluid time step, s                     | 1×10 <sup>-5</sup> |
| CFD cells number                 | 63×200×1 | DEM time step, s                       | 4×10 <sup>-6</sup> |
| Particles number                 | 10850    | Particle normal stiffness, N/m         | 1000               |
| Particle diameter, m             | 0.0002   | Particle normal restitution coeff.     | 0.9                |
| Inlet gas velocity, m/s          | 0.052    | Particle frictional coefficient        | 0.1                |
| Inlet gas temperature, °C        | 30 °C    | Particle tangential stiffness, N/m     | 285                |
| Inlet gas temperature, °C        | 27 °C    | Particle tangential restitution coeff. | 0.3                |
| Initial particle temperature, °C | 600 °C   |                                        |                    |

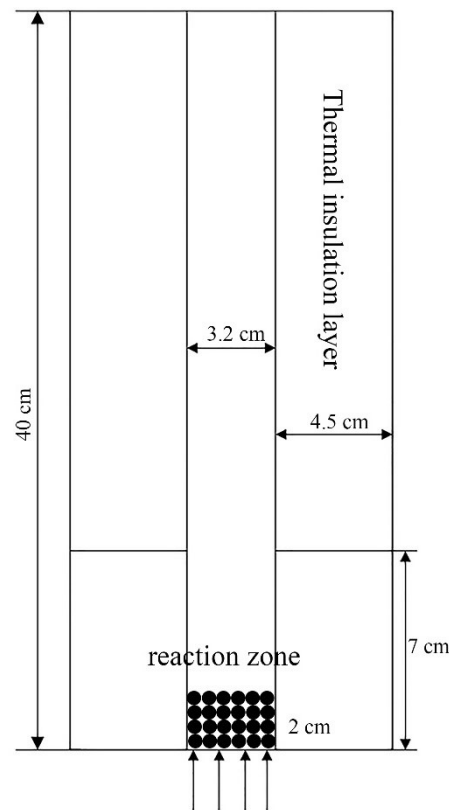

60

61

Fig. S1. Computational domain of the bubbling fluidized bed reactor.

62 Model validation

63 Fig. S2 presents the simulation results of bed pressure drop and bed temperature during exothermic stage.

64 The bed pressure drop reflects the fluidization state of particles. In 10-20s, the simulated pressure drop is shown

65 in Fig. S2(b). The average pressure drop in our calculation results is 192 Pa, and the predicted value calculated

66 according to the Ecuadorian formula<sup>2</sup> is 188 Pa, which is about 97% of our simulated value. It is generally believed

67 that the error is within 10% to be reliable<sup>3</sup>. The change of bed temperature reflects the chemical reaction and heat

68 transfer between gas and solid. The simulated temperature curve in Fig. S2(a) fits well with the measured  
69 temperature curve except in the temperature transition region. This is because the reaction kinetics formula used  
70 in the simulation does not represent the transition region well, but it has a negligible effect on the simulation  
71 results. The comparison in the simulation and experimental results shows that the CFD-DEM model is reasonable  
72 for calculating the exothermic process of calcined limestone.

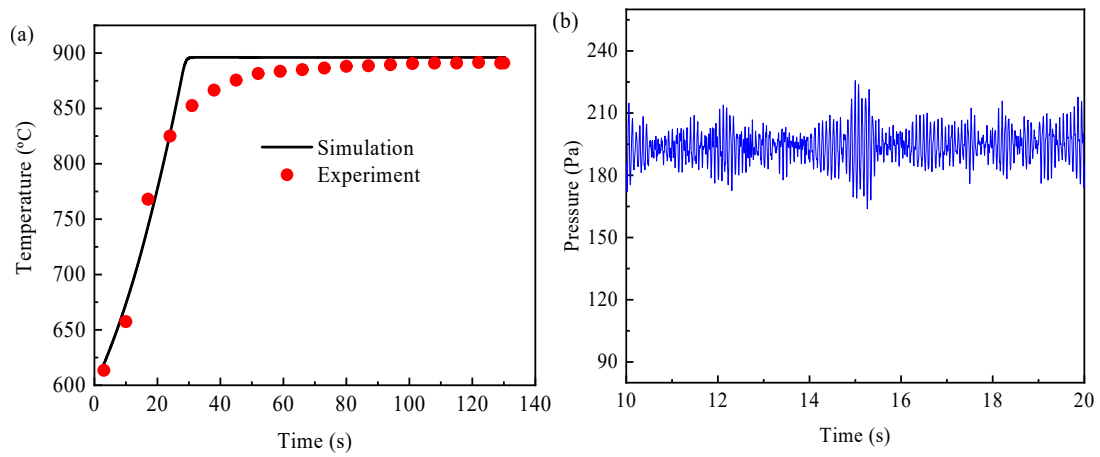

73

74 Fig. S2. Comparison in simulation and experimental results: (a) bed temperature, (b) bed pressure drop.

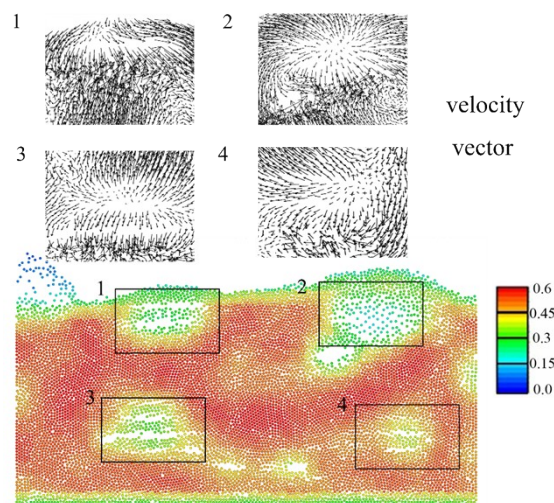

75

76

Fig. S3. Snapshots of particle dynamics (particles colored by volume fraction).

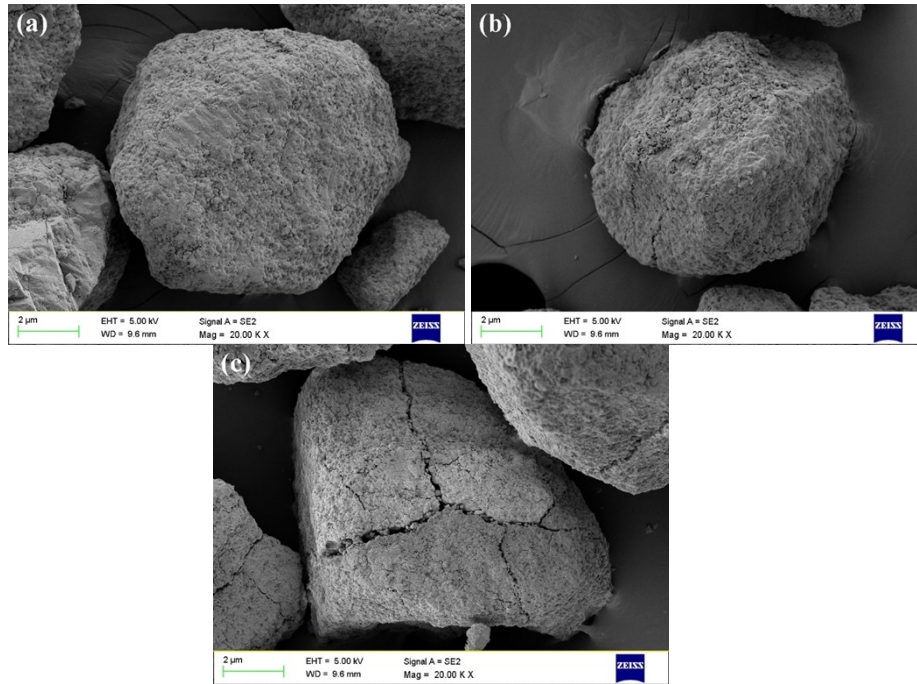

77

78

79 Fig. S4. SEM images of the original calcined limestone and the calcined limestone under different calcination and  
80 carbonation atmospheres: (a) original calcined limestone, 700×; (b) limestone 80% H<sub>2</sub>O/20% CO<sub>2</sub> mixture and  
81 carbonated under 20% H<sub>2</sub>O/80% CO<sub>2</sub> mixture after 10 cycles, 20000×; (c) limestone calcined under steam and  
82 carbonated under CO<sub>2</sub> after 10 cycles, 20000×.

### 83 References

- 84 1. P. Sun, J. R. Grace, C. J. Lim and E. J. Anthony, *Chemical Engineering Science*, 2008, **63**, 47-56.
- 85 2. S. Ergun, *Journal of Materials Science and Chemical Engineering*, 1952, **48**, 89-94.
- 86 3. Y. Zhang, M. Ye, Y. Zhao, T. Gu, R. Xiao and Z. Liu, *Powder Technology*, 2015, **275**, 199-210.

87
